# Supplementary material
Source: Elsevier journal article supplement (https://www.sciencedirect.com/science/article/pii/S1695403320300151)
Supplement: mmc1 [file S1695403320300151:mmc1.docx]

**Anexo 1.**

Los autores del manuscrito Recomendaciones sobre el diagnóstico y tratamiento de la infección urinaria: Roi Piñeiro Pérez (SEIP y CM-AEP). María José Cilleruelo Ortega (SEIP). Josefa Ares Álvarez (SEIP). Fernando Baquero-Artigao (SEIP). Juan Carlos Silva Rico (SEPEAP). Roberto Velasco Zuñiga (SEUP). Leticia Martínez Campos (SEIP y SEPHO). Begoña Carazo Gallego (SEIP). Antonio José Conejo Fernández (SEIP). Cristina Calvo Rey (SEIP y CM-AEP). Santiago Alfayate Miguélez (SEIP). Alicia Berghezan Suárez (SEIP). César García Vera (participante sin sociedad asignada). Juan José García García (SEPHO). Marisa Herreros Fernández (SEUP). Carlos Rodrigo Gonzalo de Liria. (SEIP).
